# Supplementary material for: Evaluation of the effect ofMoringa peregrinabark on the crystal habit and size of calcium oxalate monohydrate crystals in different stages of crystallization using experimental and theoretical methods
Source: Royal Society of Chemistry journal article supplement (doi:10.1039/d1ce00080b), 2021-01-01
Supplement: d1ce00080b1.pdf [file d1ce00080b1.pdf]

Supporting Information for

**Evaluation of the Effect of *Moringa peregrina* bark on the Crystal Habit and Size of Calcium Oxalate Monohydrate Crystals in Different Stages of Crystallization using Experimental and Theoretical Methods†**

Sindhu Menon\*, Hajar Khalfan Al Mamari, Hajar Hassan Al Zaabi, Zainab Sulaiman Al Ajmi, Laila Hamed Al Haddabi, V. P. Jayachandran and C. B. Shinisha\*

## Table of contents

| <b>List of Tables</b>                   |                                                                                                                                                                                                                                                                                                                                                                                                                                                                                                                                                                                 |          |
|-----------------------------------------|---------------------------------------------------------------------------------------------------------------------------------------------------------------------------------------------------------------------------------------------------------------------------------------------------------------------------------------------------------------------------------------------------------------------------------------------------------------------------------------------------------------------------------------------------------------------------------|----------|
| S. No.                                  | Title                                                                                                                                                                                                                                                                                                                                                                                                                                                                                                                                                                           | Page No. |
| Table S1                                | Sampling of <i>Moringa peregrina</i> bark                                                                                                                                                                                                                                                                                                                                                                                                                                                                                                                                       | 3        |
| Table S2A                               | Turbidity (NTU) vs Time (min)                                                                                                                                                                                                                                                                                                                                                                                                                                                                                                                                                   | 7        |
| Table S2B                               | Average Turbidity (NTU) vs Time (min)                                                                                                                                                                                                                                                                                                                                                                                                                                                                                                                                           | 7        |
| Table S3                                | FT-IR peaks of Calcium Oxalate Monohydrate                                                                                                                                                                                                                                                                                                                                                                                                                                                                                                                                      | 8        |
| Table S4                                | Lengths of some COM crystals as measured from SEM                                                                                                                                                                                                                                                                                                                                                                                                                                                                                                                               | 9        |
| Table S5                                | Descriptive statistics of the lengths of the crystals formed under various conditions                                                                                                                                                                                                                                                                                                                                                                                                                                                                                           | 15       |
| Table S6                                | Coordinates of optimized geometries of the complexes formed between stone unit, apigenin and neochlorogenic acid                                                                                                                                                                                                                                                                                                                                                                                                                                                                | 16-19    |
| Table S7                                | A comparison of structural parameters in COM unit before and after binding with apigenin                                                                                                                                                                                                                                                                                                                                                                                                                                                                                        | 20       |
| <b>List of Figures</b>                  |                                                                                                                                                                                                                                                                                                                                                                                                                                                                                                                                                                                 |          |
| Figure S1                               | <i>Moringa peregrina</i> tree in Al Waariya valley                                                                                                                                                                                                                                                                                                                                                                                                                                                                                                                              | 3        |
| Figure S2                               | LCMS Analysis (a) ESI Positive: Chromatogram (b) ESI Negative Chromatogram (c) UV Data against time in minutes (d) Assigned Mass Spectra                                                                                                                                                                                                                                                                                                                                                                                                                                        | 4-6      |
| Figure S3                               | FT-IR of Calcium Oxalate Monohydrate                                                                                                                                                                                                                                                                                                                                                                                                                                                                                                                                            | 8        |
| Figure S4                               | X-Ray Diffraction: powder diffraction pattern of calcium oxalate monohydrate crystals                                                                                                                                                                                                                                                                                                                                                                                                                                                                                           | 9        |
| Figure S5                               | SEM of calcium oxalate monohydrate crystals with tabulation of the length of several crystals                                                                                                                                                                                                                                                                                                                                                                                                                                                                                   | 9        |
| Figure S6                               | FT IR Spectra of precipitates of different suspensions (a) Control suspension 1 (b) with <i>M. Peregrina</i> bark extract 7.5 mg/ml suspension 1 (c) Control Suspension 2 (d) ) with <i>M. Peregrina</i> bark extract 7.5 mg/ml suspension 2 (e) Control Suspension 3 (f) ) with <i>M. Peregrina</i> bark extract 7.5 mg/ml suspension 3                                                                                                                                                                                                                                        | 10-11    |
| Figure S7                               | Microscopy Images of precipitates formed in various suspensions                                                                                                                                                                                                                                                                                                                                                                                                                                                                                                                 | 12       |
| Figure S8                               | <b>SEM Suspension 1:</b> (a) Crystals and (b) Histogram of length of crystals of control of suspension 1. (c) Crystals and (d) Histogram of length of crystals of suspension 1 with <i>M. peregrina</i> bark extract. <b>SEM Suspension 2:</b> (e) Crystals and (f) Histogram of length of crystals of control of suspension 2. (g) Crystals and (h) Histogram of length of crystals of suspension 2 with <i>M. peregrina</i> bark extract. <b>SEM Suspension 3</b> (i) Crystals of control of suspension 3 (j) Crystals of suspension 3 with <i>M. peregrina</i> bark extract. | 12-13    |
| Figure S9                               | Powder X-ray Diffraction pattern of calcium oxalate monohydrate seed crystals with those grown in Suspension 3 (with inhibitor, <i>M. peregrina</i> bark)                                                                                                                                                                                                                                                                                                                                                                                                                       | 14       |
| Figure S10                              | Complex formed between COM and apigenin through 2 sites of calcium coordination                                                                                                                                                                                                                                                                                                                                                                                                                                                                                                 | 15       |
| <b>Other information</b>                |                                                                                                                                                                                                                                                                                                                                                                                                                                                                                                                                                                                 |          |
| LC-MS Instrument and running conditions |                                                                                                                                                                                                                                                                                                                                                                                                                                                                                                                                                                                 | 4        |
| Complete citation of ref 25b.           |                                                                                                                                                                                                                                                                                                                                                                                                                                                                                                                                                                                 | 20       |

## 1. SAMPLING

| Sample                         | <i>Moringa peregrina</i> bark                                                                                  |
|--------------------------------|----------------------------------------------------------------------------------------------------------------|
| Date/time                      | 19/Sep/2019/ 11.00 AM                                                                                          |
| Place                          | Al-Waariya in (Almudabi) in north AL-Sharqiya governorate, Sultanate of Oman (22° 32' 13" N and 58° 27' 21")   |
| Number & size                  | 6 trees located on the slopes of Al Waariya valley or by the constructed road. The height ranged from 2 to 5 m |
| Drying method                  | Natural 35°C                                                                                                   |
| Storage method before grinding | Paper bag                                                                                                      |
| Storage method after grinding. | Glass container                                                                                                |

**Table S1.** Sampling of *Moringa peregrina* bark

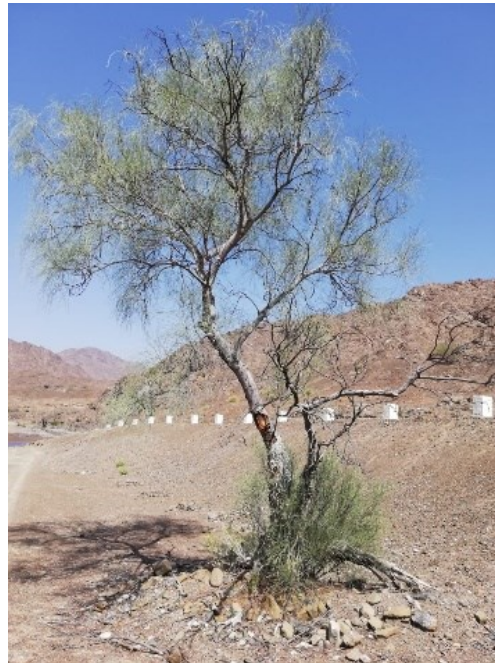

**Figure S1.** *Moringa peregrina* tree in Al Waariya valley

## 2. LC-MS

LC-MS analysis of the 7.5 mg ml<sup>-1</sup> bark extract was carried out using Agilent Technologies Triple Quad LC/MS system, equipped with 6460 Triple Quad MS Detector, a High Performance Autosampler (G4226A), Quaternary Pump (G4204A), Diode Array Detector (DAD) (G4212A) and Thermostatted Column Compartment (G1316C) under ESI positive as well as negative conditions using the column Waters Resolve 5µm Spherical C18, 3.9X150mm, Part No: WAT085711.

Mobile phase: Containing 0.1% formic acid (v/v) in water (A) and 0.1% formic acid (v/v) in acetonitrile (B) used in isocratic elution with 70% A

Column used: Waters Resolve 5µm Spherical C18, 3.9X150mm, Part No: WAT085711, Column temperature: 25°C, Injection volume: 20 µL, Flow rate: Flow: 0.200 ml/min, Eluent monitoring: ESI-MS under positive ion and negative ion mode scanned, Time filter width: 0.07 min, Gas temperature: 300°C, Gas flow rate: 5L/min, Nebulization: At 50 psi, Gas used: Nitrogen, Scan Time 150 min, Data acquisition: Agilent Mass Hunter

The wavelengths set for the DAD UV-visible set-up were 254 nm, 282 nm and 370 nm.

Chromatograms:

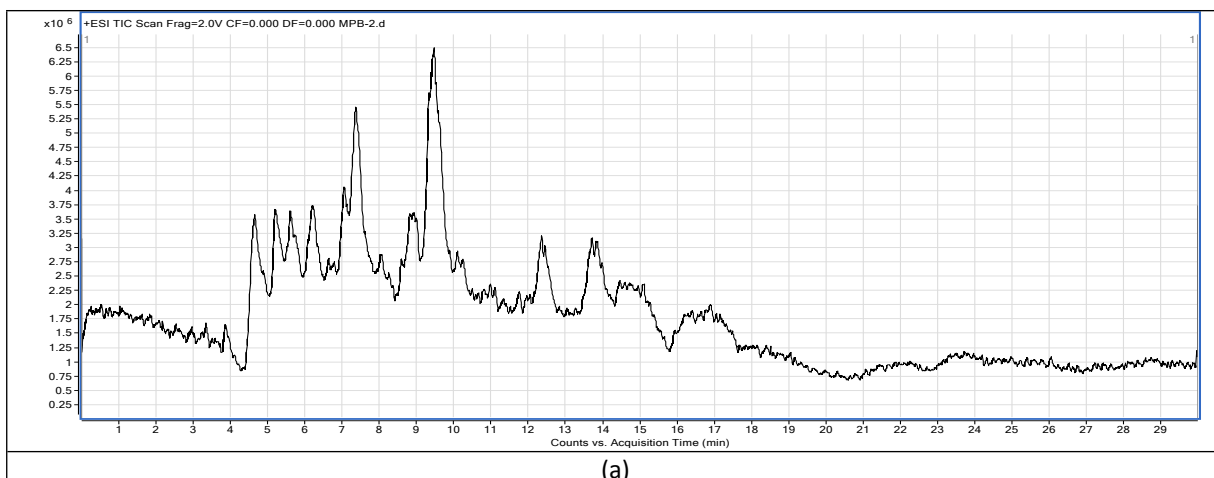

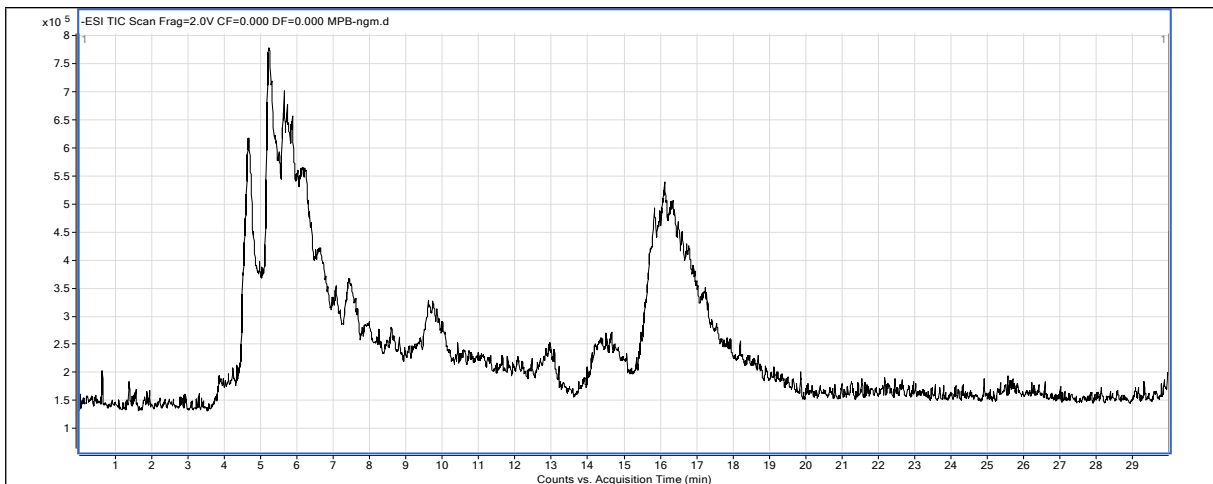

(b)

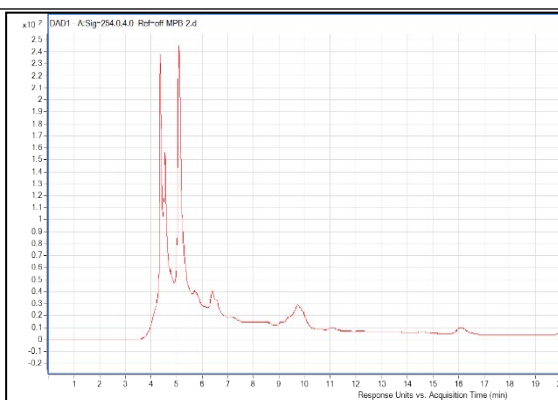

$\lambda = 254 \text{ nm}$

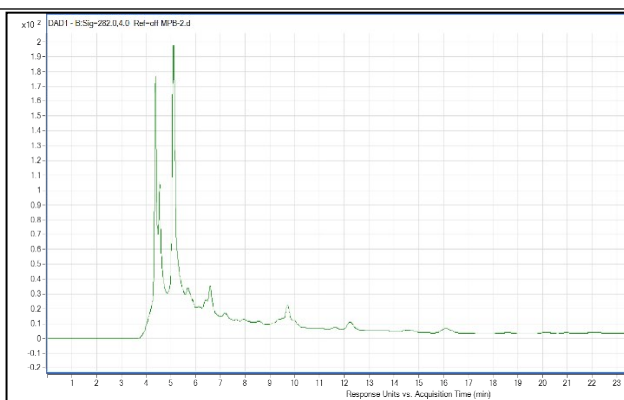

$\lambda = 282 \text{ nm}$

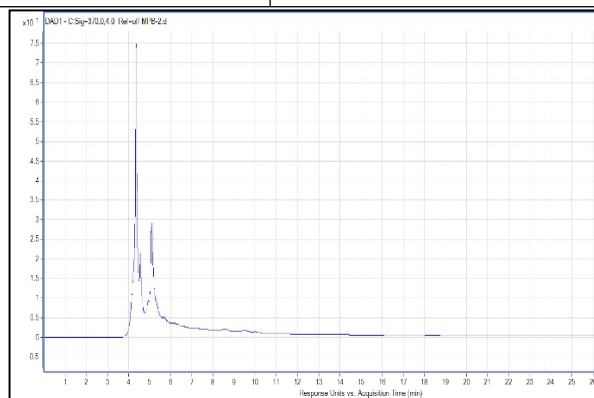

$\lambda = 370 \text{ nm}$

(c)

(i) Time = 5.73 min : Vicenin 2 (% purity = 14.5%)



### 3. TURBIDITY MEASUREMENTS

**Table S2A.** Turbidity (NTU) vs Time (min)

| Time | A       |         |         | B       |         |         | C       |         |         |
|------|---------|---------|---------|---------|---------|---------|---------|---------|---------|
|      | 1 mg/ml | 2 mg/ml | 0 mg/ml | 1 mg/ml | 2 mg/ml | 0 mg/ml | 1 mg/ml | 2 mg/ml | 0 mg/ml |
| 10   | 0.70    | 0.41    | 1.82    | 0.79    | 0.31    | 1.69    | 0.34    | 0.19    | 1.54    |
| 20   | 1.35    | 0.73    | 4.50    | 1.58    | 0.84    | 4.94    | 2.06    | 0.33    | 5.84    |
| 30   | 2.08    | 1.43    | 7.00    | 2.10    | 1.58    | 7.35    | 1.73    | 1.29    | 5.96    |
| 40   | 3.61    | 1.71    | 8.08    | 3.68    | 1.89    | 8.93    | 2.59    | 2.01    | 7.60    |
| 50   | 4.25    | 3.82    | 12.51   | 4.57    | 4.22    | 13.70   | 4.17    | 3.75    | 12.77   |
| 60   | 2.56    | 0.95    | 6.77    | 2.73    | 1.05    | 7.90    | 2.18    | 1.03    | 6.33    |
| 70   | 2.69    | 1.44    | 7.01    | 2.84    | 1.31    | 8.40    | 2.25    | 2.46    | 6.71    |
| 80   | 2.80    | 1.38    | 6.50    | 2.99    | 1.52    | 7.35    | 2.64    | 1.93    | 6.64    |
| pH   | 5.80    | 5.70    | 5.72    | 5.68    | 5.40    | 5.70    | 5.83    | 5.58    | 5.68    |

**Table S2B.** Average Turbidity (NTU) vs Time (min)

| Time | 1 mg/ml | 2 mg/ml | 0 mg/ml |
|------|---------|---------|---------|
| 10   | 0.61    | 0.35    | 1.68    |
| 20   | 1.66    | 0.63    | 5.09    |
| 30   | 1.97    | 1.43    | 6.77    |
| 40   | 3.29    | 1.87    | 8.20    |
| 50   | 4.33    | 3.93    | 12.99   |
| 60   | 2.49    | 1.01    | 7.00    |
| 70   | 2.59    | 1.74    | 7.37    |
| 80   | 2.81    | 1.61    | 6.83    |

|       |      |      |      |
|-------|------|------|------|
| Av pH | 5.77 | 5.56 | 5.70 |
|-------|------|------|------|

**4. CHARACTERIZATION OF CALCIUM OXALATE MONOHYDRATE**

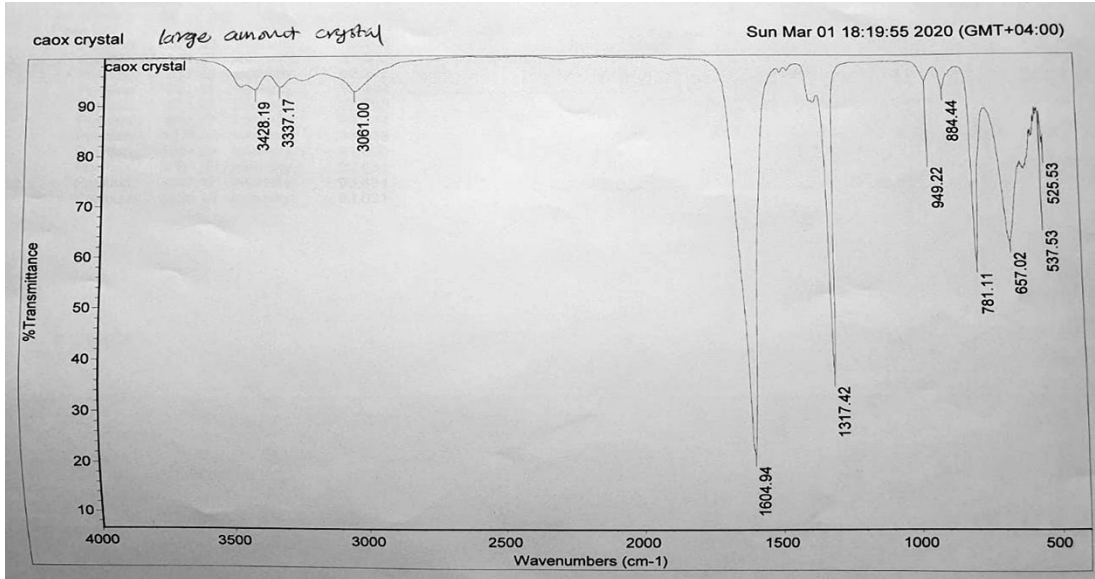

**Figure S3.** FT-IR of Calcium Oxalate Monohydrate

**Table S3.** FT-IR peaks of Calcium Oxalate Monohydrate  
 Region: 4000.00 400.00; Absolute threshold: 99.624

Sensitivity: 60

| Position $\text{cm}^{-1}$ | Intensity | Position $\text{cm}^{-1}$ | Intensity |
|---------------------------|-----------|---------------------------|-----------|
| 525.53                    | 79.868    | 1317.42                   | 36.336    |
| 537.53                    | 84.902    | 1604.94                   | 21.000    |
| 657.02                    | 62.232    | 3061.00                   | 92.631    |
| 781.11                    | 58.404    | 3337.17                   | 93.484    |
| 884.44                    | 92.793    | 3428.19                   | 93.031    |
| 949.22                    | 94.444    |                           |           |



IR peaks for COM crystal: 3428  $\text{cm}^{-1}$ , 3061  $\text{cm}^{-1}$  (Symmetric and asymmetric O-H stretching), 1605  $\text{cm}^{-1}$ , 1317  $\text{cm}^{-1}$  (C=O, C-O stretch), 949.36, 884  $\text{cm}^{-1}$  (C-C stretch), 781  $\text{cm}^{-1}$ , 657  $\text{cm}^{-1}$  (out of plane O-H bending and C-H bending)

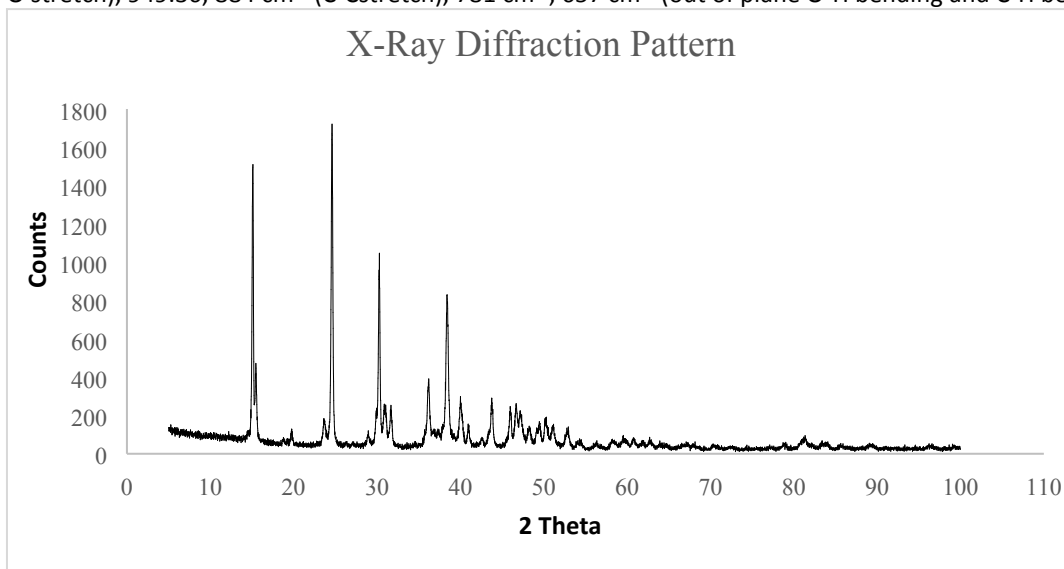

**Figure S4.** Powder X-Ray Diffraction: pattern of calcium oxalate monohydrate crystals

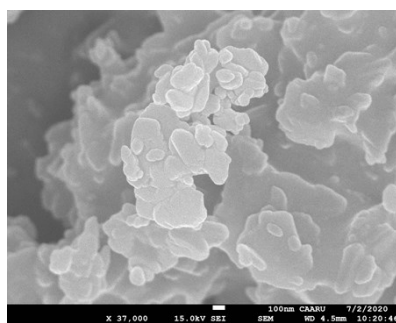

**Figure S5.** SEM of calcium oxalate monohydrate crystals

**Table S4.** Lengths of some COM crystals as measured from SEM

| Length in nm |         |         |
|--------------|---------|---------|
| 247.409      | 448.951 | 119.109 |
| 269.884      | 221.43  | 387.432 |
| 387.03       | 250.121 | 265.75  |
| 282.965      | 239.449 | 243.745 |
| 453.399      | 307.968 | 505.172 |
| 423.57       | 329.969 | 198.306 |
| 135.805      | 475.162 | 198.459 |
| 213.797      | 353.039 | 181.426 |
| 305.089      | 417.274 | 348.253 |
| 525.113      | 137.828 | 437.774 |
| 280.771      | 188.327 | 286.081 |

5. CHARACTERIZATION OF PRECIPITATE UNDER VARIOUS CONDITIONS

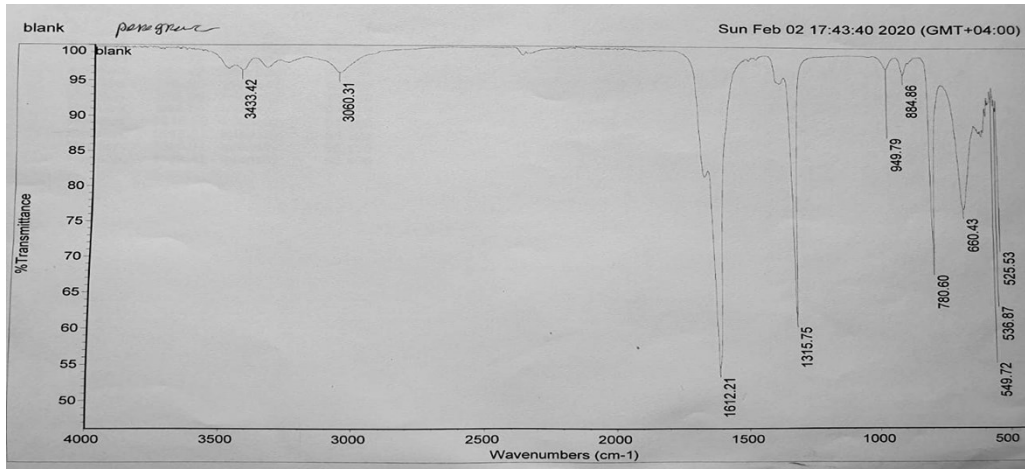

(a)

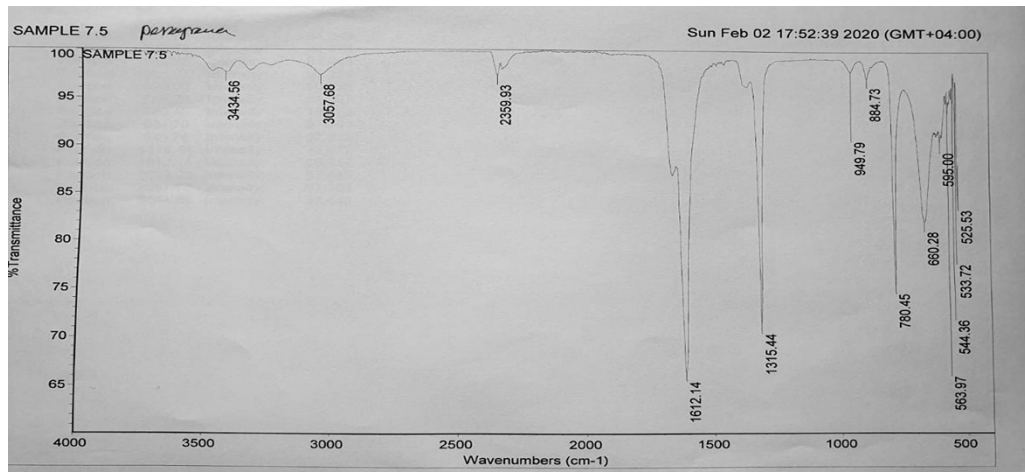

(b)

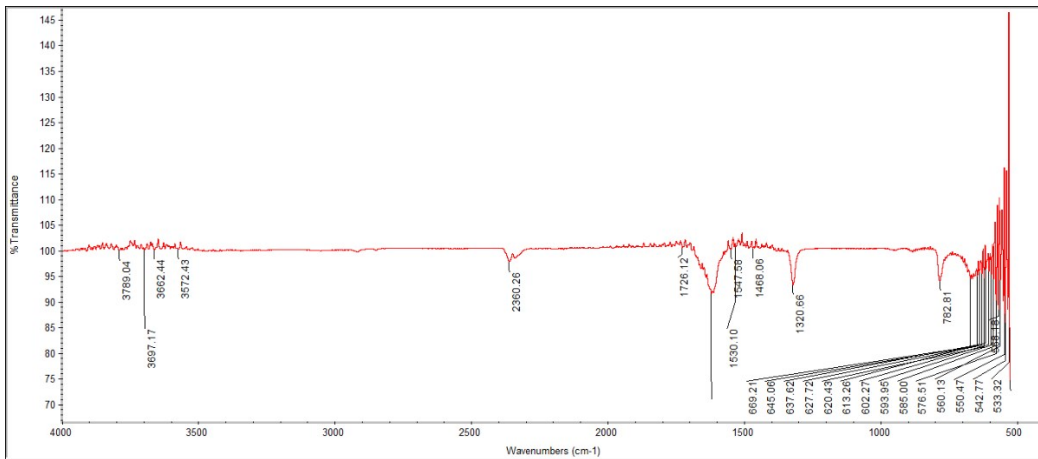

(c)

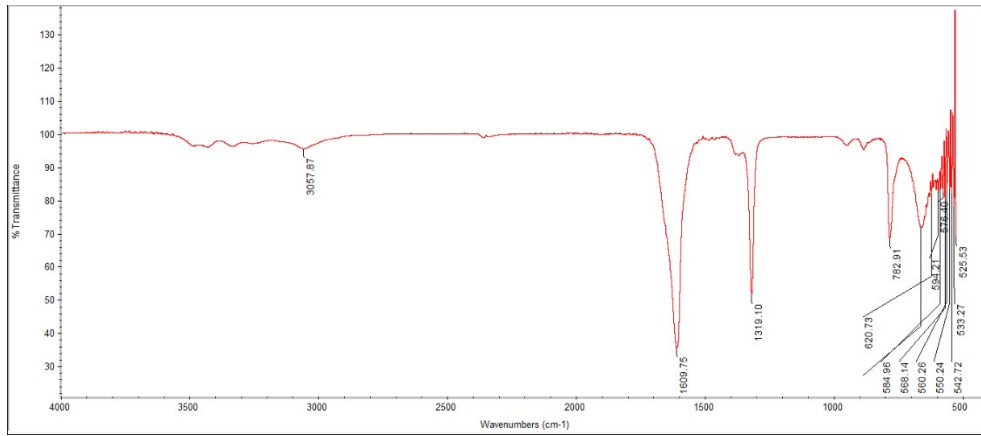

(d)

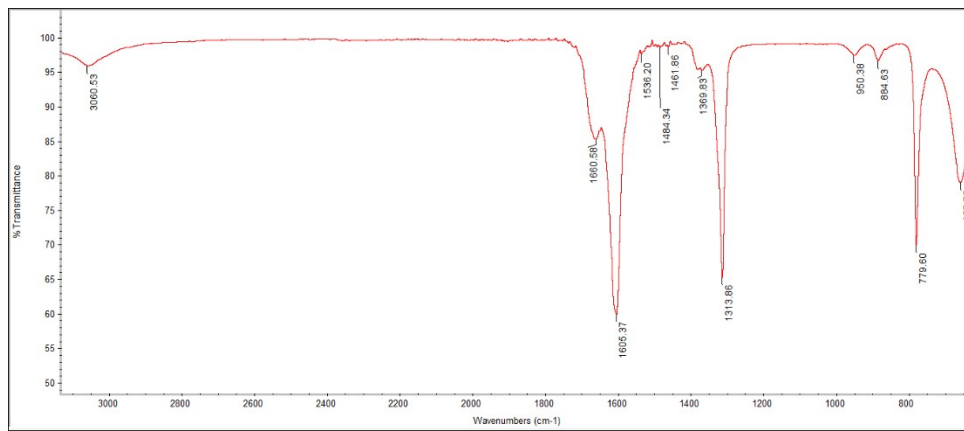

(e)

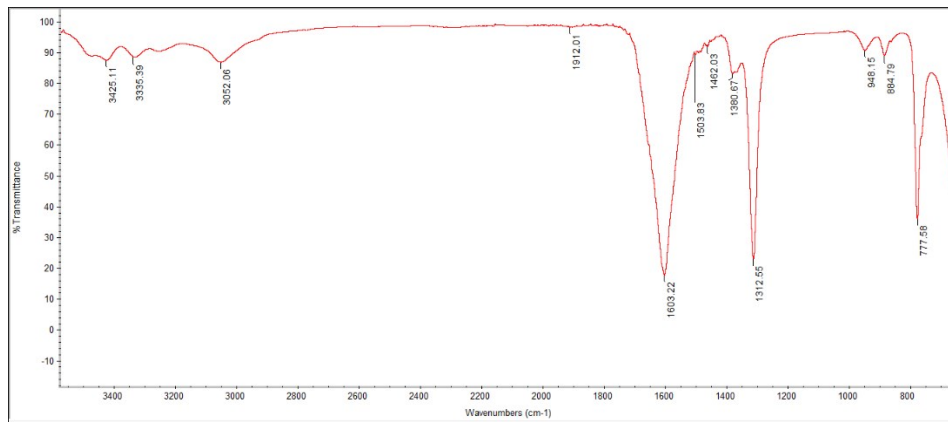

**Figure S6.** FT IR Spectra of precipitates of different suspensions (a) Control suspension 1 (b) with *M. Peregrina* bark extract 7.5 mg/ml suspension 1 (c) Control Suspension 2 (d) with *M. Peregrina* bark extract 7.5 mg/ml suspension 2 (e) Control Suspension 3 (f) with *M. Peregrina* bark extract 7.5 mg/ml suspension 3

| <b>Suspension 1 Microscopy:</b>                                                    |                                                                                   | <b>Suspension 2 Microscopy</b>                                                     |                                                                                     |
|------------------------------------------------------------------------------------|-----------------------------------------------------------------------------------|------------------------------------------------------------------------------------|-------------------------------------------------------------------------------------|
| 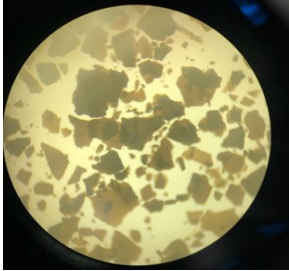  |  |  |  |
| (i)Control                                                                         | (ii) <i>M. peregrina</i> bark (7.5 mg/ml)                                         | (i) Control                                                                        | (ii) <i>M. peregrina</i> bark (7.5 mg/ml)                                           |
| <b>Suspension 3 Microscopy</b>                                                     |                                                                                   |                                                                                    |                                                                                     |
|  |  |                                                                                    |                                                                                     |
| (i)Control                                                                         | (ii) <i>M. peregrina</i> bark (7.5 mg/ml)                                         |                                                                                    |                                                                                     |

Figure S7. Microscopy Images of precipitates formed in various suspensions

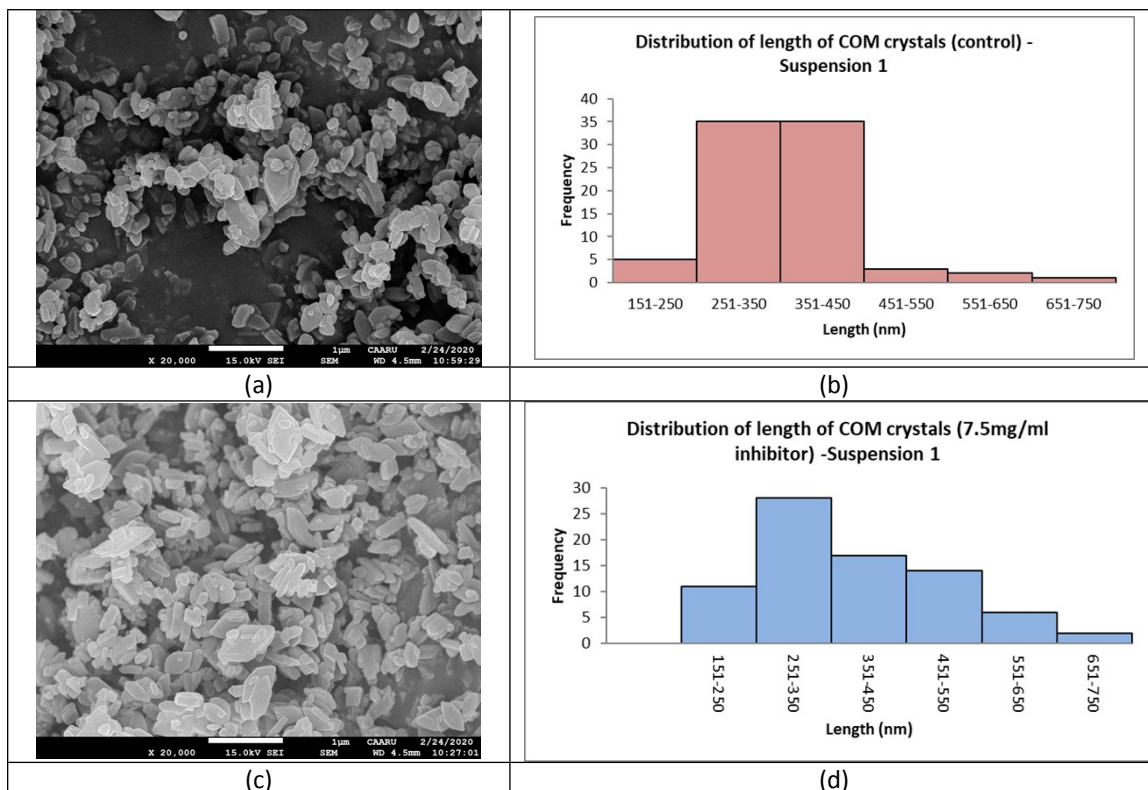

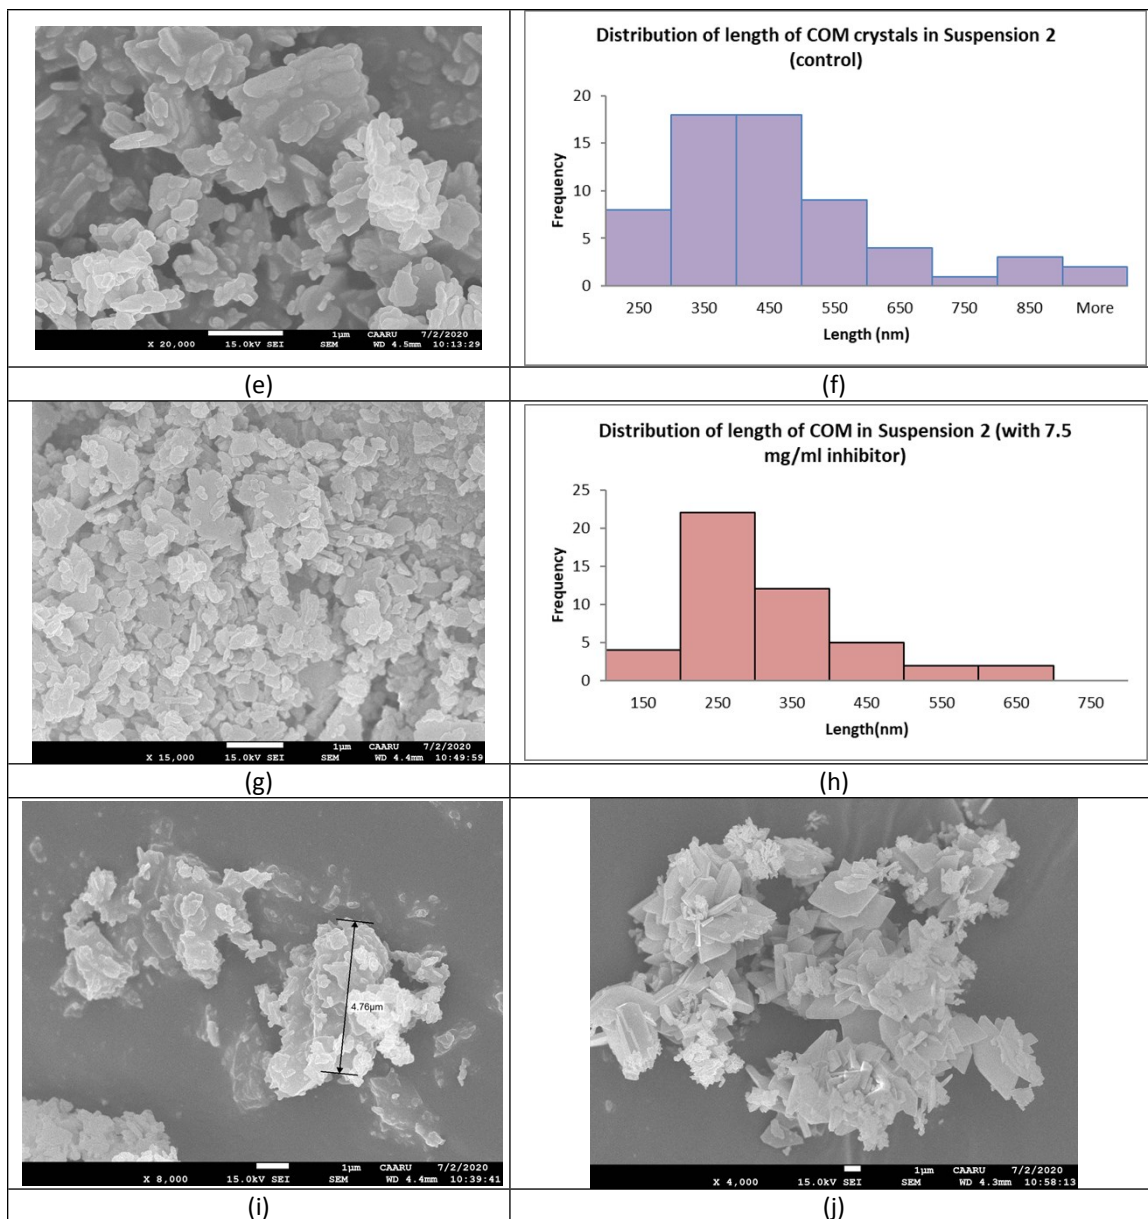

**Figure S8. SEM Suspension 1:** (a) Crystals and (b) Histogram of length of crystals of control of suspension 1. (c) Crystals and (d) Histogram of length of crystals of suspension 1 with *M. peregrina* bark extract. **SEM Suspension 2:** (e) Crystals and (f) Histogram of length of crystals of control of suspension 2. (g) Crystals and (h) Histogram of length of crystals of suspension 2 with *M. peregrina* bark extract. **SEM Suspension 3** (i) Crystals of control of suspension 3 (j) Crystals of suspension 3 with *M. peregrina* bark extract.

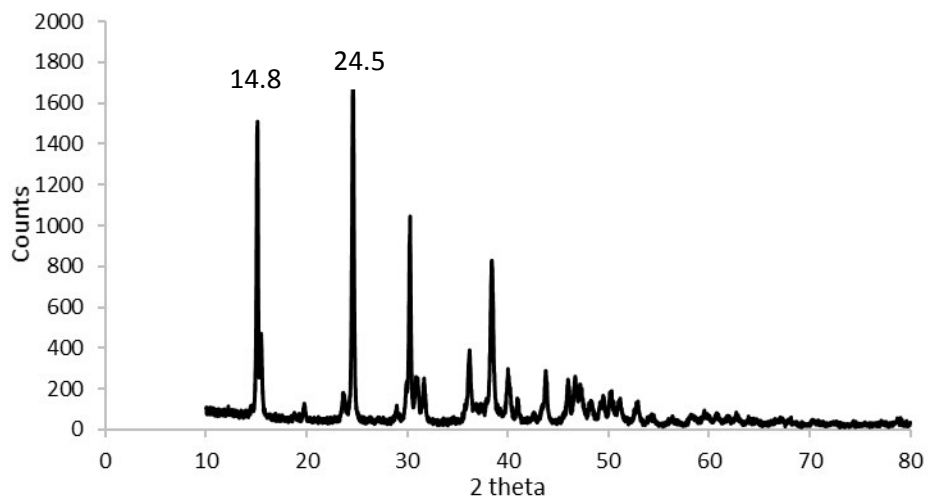

A.

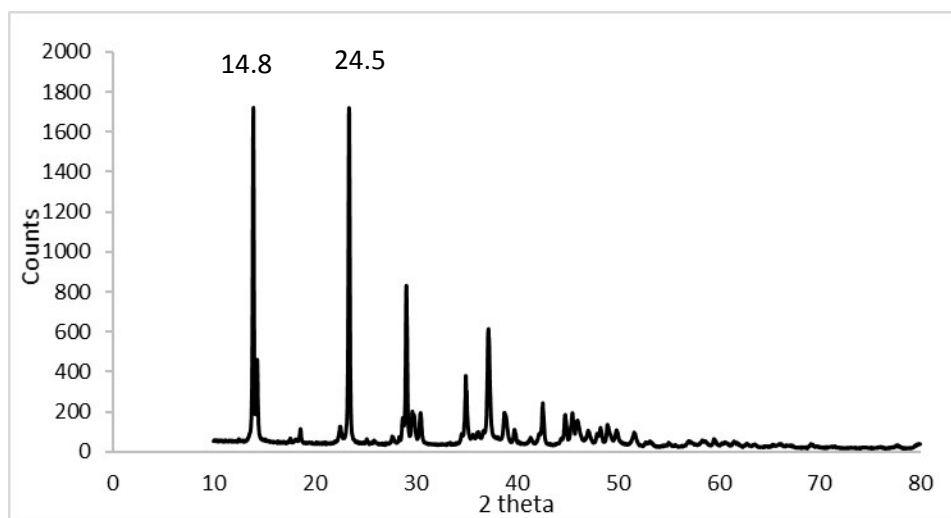

B.

**Figure S9.** Powder X-ray Diffraction pattern of A. calcium oxalate monohydrate crystals and B. Crystals grown in Suspension 3 (with inhibitor, *M. peregrina* bark). The spectra have been normalized by equalizing the peaks at 24.5° in both cases.

**Table S5.** Descriptive statistics of the lengths of the crystals formed under various conditions

|                    | Suspension 1<br>(Control) | Suspension 1<br>( <i>M. peregrina</i> ) | Suspension 2<br>(Control) | Suspension 2<br>( <i>M. peregrina</i> ) |
|--------------------|---------------------------|-----------------------------------------|---------------------------|-----------------------------------------|
| Mean               | 345.6                     | 378.4                                   | 420.8                     | 263.6                                   |
| Standard Error     | 9.7                       | 14.7                                    | 25.4                      | 16.9                                    |
| Median             | 351.0                     | 348.5                                   | 378.6                     | 217.8                                   |
| Mode               | 367.0                     | 610.0                                   | 809.5                     | 216.1                                   |
| Standard Deviation | 87.2                      | 130.2                                   | 201.4                     | 116.0                                   |
| Sample Variance    | 7612.2                    | 16942.2                                 | 40568.9                   | 13456.9                                 |
| Kurtosis           | 4.6                       | -0.2                                    | 7.1                       | 2.3                                     |
| Skewness           | 1.5                       | 0.6                                     | 2.2                       | 1.5                                     |
| Range              | 528.0                     | 549.0                                   | 1207.4                    | 519.5                                   |
| Minimum            | 190.0                     | 161.0                                   | 154.2                     | 120.0                                   |
| Maximum            | 718.0                     | 710.0                                   | 1361.6                    | 639.4                                   |
| Sum                | 27996.0                   | 29513.0                                 | 26512.5                   | 12390.3                                 |
| Count              | 81                        | 78                                      | 63                        | 50                                      |

## 6. STRUCTURAL ANALYSIS

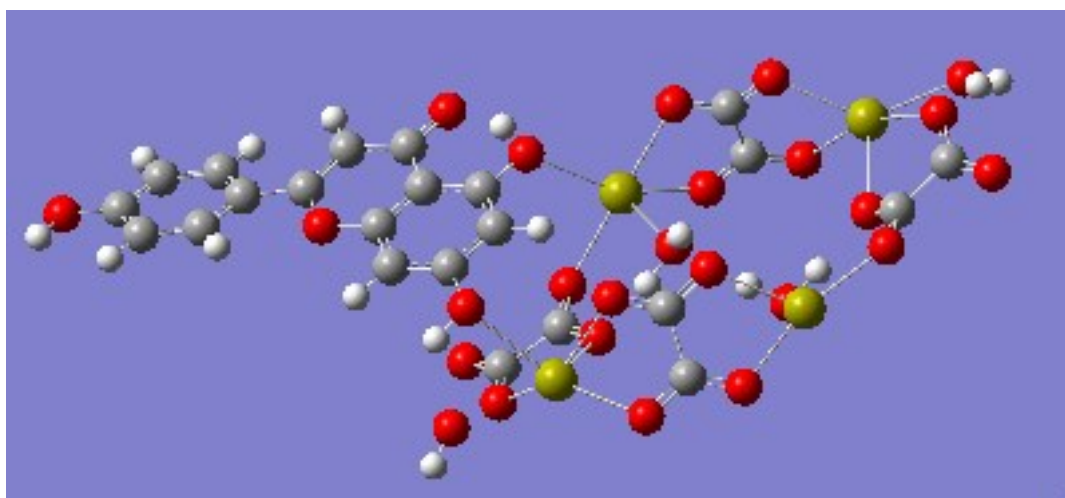

**Figure S10.** Optimized geometry of complex formed between COM and apigenin through two sites of calcium coordination

**Table S6.** Coordinates of optimized geometries of the complexes formed between stone unit, apigenin and neochlorogenic acid at B3LYP/6-31G\* level of theory

| COM-Apigenin-chelation complex<br>NImag=0<br>HF=-5479.0500233 |           |          |          | COM-Apigenin-bridging on Calcium<br>NImag=0<br>HF=-5479.0326969 |           |           |           |
|---------------------------------------------------------------|-----------|----------|----------|-----------------------------------------------------------------|-----------|-----------|-----------|
| 6                                                             | -1.846477 | -2.48917 | 0.60237  | 6                                                               | 2.94456   | -3.191641 | -0.362249 |
| 6                                                             | -1.920105 | -2.33301 | -0.97313 | 6                                                               | 3.12962   | -3.092582 | 1.218734  |
| 8                                                             | -0.862743 | -1.93735 | 1.164891 | 8                                                               | 1.780712  | -3.001068 | -0.805916 |
| 8                                                             | -0.905681 | -1.90075 | -1.56365 | 8                                                               | 2.104594  | -2.784741 | 1.887698  |
| 8                                                             | -2.790716 | -3.10672 | 1.16008  | 8                                                               | 3.984189  | -3.399436 | -1.043057 |
| 8                                                             | -3.043035 | -2.59295 | -1.51465 | 8                                                               | 4.292453  | -3.275663 | 1.665738  |
| 20                                                            | -4.770275 | -3.30259 | -0.07269 | 20                                                              | 5.985934  | -2.999813 | 0.074552  |
| 20                                                            | 0.492528  | -0.51101 | -0.24396 | 20                                                              | 0.455533  | -1.736437 | 0.62645   |
| 8                                                             | 2.865446  | 3.888119 | 1.105071 | 8                                                               | -3.17535  | 1.161872  | 2.628293  |
| 8                                                             | 1.278903  | 1.622801 | 0.353063 | 8                                                               | -0.838712 | -0.206139 | 1.865977  |
| 6                                                             | -3.50462  | 2.846892 | 0.921957 | 6                                                               | 2.007999  | 3.061926  | -1.113845 |
| 6                                                             | -3.985546 | 3.78211  | -0.26412 | 6                                                               | 2.391433  | 4.272695  | -0.16286  |
| 6                                                             | 1.646382  | 3.934549 | 1.076269 | 6                                                               | -2.249181 | 1.789183  | 2.146813  |
| 6                                                             | 0.860614  | 2.800845 | 0.336046 | 6                                                               | -0.91364  | 1.039778  | 1.771317  |
| 8                                                             | -2.736169 | 3.342972 | 1.778522 | 8                                                               | 0.802972  | 2.938277  | -1.429948 |
| 8                                                             | -3.363061 | 4.868229 | -0.39786 | 8                                                               | 1.429812  | 4.932348  | 0.306892  |
| 8                                                             | -3.858198 | 1.626974 | 0.85517  | 8                                                               | 2.934671  | 2.236611  | -1.397202 |
| 8                                                             | -4.900599 | 3.329174 | -1.00293 | 8                                                               | 3.618561  | 4.420407  | 0.095504  |
| 8                                                             | 0.858066  | 4.840721 | 1.573536 | 8                                                               | -2.208118 | 3.049588  | 1.820639  |
| 8                                                             | -0.220302 | 3.167483 | -0.26886 | 8                                                               | 0.027042  | 1.776436  | 1.295419  |
| 20                                                            | -5.295697 | 1.026989 | -0.91759 | 20                                                              | 4.902836  | 2.507192  | -0.176015 |
| 20                                                            | -1.340278 | 4.952632 | 0.800556 | 20                                                              | -0.637686 | 3.798311  | 0.24803   |
| 8                                                             | -5.832046 | -1.20188 | -0.1482  | 8                                                               | 6.073733  | -0.657745 | 0.412831  |
| 8                                                             | -6.910285 | -3.55834 | -0.97261 | 8                                                               | 7.806175  | -2.079868 | -1.08019  |
| 6                                                             | -6.942025 | -1.1876  | -0.835   | 6                                                               | 6.874819  | -0.007579 | -0.347333 |
| 6                                                             | -7.717007 | -2.53982 | -0.9249  | 6                                                               | 8.07544   | -0.818379 | -0.949957 |
| 8                                                             | -7.337909 | -0.14276 | -1.39669 | 8                                                               | 6.744403  | 1.220378  | -0.607487 |
| 8                                                             | -8.935011 | -2.5277  | -0.90807 | 8                                                               | 9.112609  | -0.224705 | -1.194925 |
| 8                                                             | -3.548094 | 0.108884 | -2.2699  | 8                                                               | 4.202768  | 0.967686  | 1.459996  |
| 1                                                             | -3.435869 | -0.86583 | -2.33511 | 1                                                               | 4.863262  | 0.241902  | 1.291925  |
| 1                                                             | -2.677912 | 0.425584 | -1.92892 | 1                                                               | 3.323863  | 0.572099  | 1.263704  |
| 8                                                             | -1.507652 | 0.90472  | -0.5818  | 8                                                               | 1.789689  | 0.209982  | 0.206713  |
| 1                                                             | -2.179626 | 0.944385 | 0.13453  | 1                                                               | 2.104843  | 0.617445  | -0.629011 |
| 1                                                             | -1.078753 | 1.820683 | -0.57643 | 1                                                               | 1.182423  | 0.901254  | 0.633451  |
| 8                                                             | -5.976117 | -5.21721 | 0.748405 | 8                                                               | 8.038435  | -4.223297 | 0.32987   |
| 1                                                             | -6.32643  | -5.66178 | 1.531963 | 1                                                               | 8.699107  | -4.580407 | 0.93808   |
| 8                                                             | -0.232758 | 7.076636 | 0.937362 | 8                                                               | -2.934063 | 4.934044  | 0.322886  |
| 1                                                             | 0.045035  | 7.873809 | 0.466848 | 1                                                               | -3.323353 | 5.778275  | 0.594988  |



|                                                                          |           |          |          |   |            |           |           |
|--------------------------------------------------------------------------|-----------|----------|----------|---|------------|-----------|-----------|
| 1                                                                        | 0.579539  | 6.577235 | 1.220335 | 1 | -3.050837  | 4.281074  | 1.08074   |
| 1                                                                        | -6.741004 | -4.9167  | 0.188255 | 1 | 8.47097    | -3.526434 | -0.230716 |
| 8                                                                        | 1.718806  | -1.80642 | 1.457007 | 8 | -1.414026  | -1.660438 | -1.015839 |
| 1                                                                        | 1.048692  | -2.19022 | 2.055176 | 6 | -1.922574  | 0.660645  | -1.316854 |
| 6                                                                        | 3.005008  | -1.96212 | 1.872807 | 6 | -2.325514  | -0.645954 | -1.088629 |
| 6                                                                        | 4.034328  | -1.60882 | 0.956199 | 6 | -2.894199  | 1.673255  | -1.278392 |
| 6                                                                        | 3.820406  | -1.13296 | -0.41361 | 8 | -2.436371  | 2.963421  | -1.410341 |
| 8                                                                        | 2.692701  | -0.97518 | -0.93805 | 1 | -3.120096  | 3.608977  | -1.133618 |
| 6                                                                        | 3.287948  | -2.44133 | 3.139346 | 1 | -0.880584  | 0.914624  | -1.483118 |
| 1                                                                        | 2.493695  | -2.70176 | 3.831652 | 1 | -1.988984  | -2.516532 | -0.958925 |
| 6                                                                        | 4.624518  | -2.57398 | 3.549908 | 6 | -4.248987  | 1.406763  | -1.093479 |
| 6                                                                        | 5.669366  | -2.22963 | 2.695883 | 6 | -3.691576  | -0.964603 | -0.89696  |
| 1                                                                        | 6.709759  | -2.32198 | 2.990356 | 6 | -4.624145  | 0.078449  | -0.905393 |
| 6                                                                        | 5.355668  | -1.75701 | 1.423057 | 1 | -4.992713  | 2.195364  | -1.061241 |
| 6                                                                        | 6.264825  | -1.00303 | -0.63829 | 6 | -4.127495  | -2.334001 | -0.676118 |
| 6                                                                        | 5.017366  | -0.84334 | -1.16032 | 6 | -6.398198  | -1.446871 | -0.491284 |
| 1                                                                        | 4.884215  | -0.45198 | -2.16014 | 6 | -5.539829  | -2.509583 | -0.48147  |
| 8                                                                        | 6.429308  | -1.45645 | 0.635728 | 1 | -5.908454  | -3.516795 | -0.340131 |
| 8                                                                        | 4.825828  | -3.04553 | 4.803426 | 8 | -5.950854  | -0.175758 | -0.709777 |
| 1                                                                        | 5.776883  | -3.07779 | 4.993931 | 8 | -3.302182  | -3.285919 | -0.677514 |
| 6                                                                        | 7.537923  | -0.72598 | -1.30743 | 6 | -7.849421  | -1.500994 | -0.296746 |
| 6                                                                        | 7.602403  | -0.55978 | -2.70539 | 6 | -8.65966   | -0.397602 | -0.617021 |
| 6                                                                        | 8.728603  | -0.61322 | -0.56887 | 6 | -8.472038  | -2.657279 | 0.215249  |
| 6                                                                        | 8.801808  | -0.2822  | -3.33998 | 6 | -10.037527 | -0.448703 | -0.447265 |
| 1                                                                        | 6.706788  | -0.66707 | -3.30828 | 1 | -8.205675  | 0.505279  | -1.007969 |
| 6                                                                        | 9.935541  | -0.33276 | -1.19725 | 6 | -9.844756  | -2.716147 | 0.388952  |
| 1                                                                        | 8.705537  | -0.73521 | 0.507755 | 1 | -7.875022  | -3.516225 | 0.502638  |
| 6                                                                        | 9.978826  | -0.16352 | -2.58678 | 6 | -10.638751 | -1.609381 | 0.055246  |
| 1                                                                        | 8.852785  | -0.16014 | -4.41671 | 1 | -10.648771 | 0.413406  | -0.706043 |
| 1                                                                        | 10.845714 | -0.24004 | -0.60835 | 1 | -10.322608 | -3.603357 | 0.790639  |
| 8                                                                        | 11.124621 | 0.110672 | -3.26253 | 8 | -11.978392 | -1.724601 | 0.24625   |
| 1                                                                        | 11.864462 | 0.172347 | -2.63753 | 1 | -12.416035 | -0.896737 | -0.00854  |
| COM-Neochlorogenic acid chelation complex<br>NImag=0<br>HF=-5822.8530569 |           |          |          |   |            |           |           |
| 6                                                                        | -4.38436  | -2.80057 | 0.027875 |   |            |           |           |
| 6                                                                        | -5.09361  | -2.16411 | -1.23759 |   |            |           |           |
| 8                                                                        | -3.1263   | -2.8549  | -0.02484 |   |            |           |           |
| 8                                                                        | -4.38577  | -1.95315 | -2.25051 |   |            |           |           |
| 8                                                                        | -5.11753  | -3.14649 | 0.989351 |   |            |           |           |
| 8                                                                        | -6.31608  | -1.84167 | -1.09974 |   |            |           |           |
| 20                                                                       | -7.27042  | -2.24617 | 1.031809 |   |            |           |           |
| 20                                                                       | -2.10171  | -1.54942 | -1.77532 |   |            |           |           |

|    |          |          |          |
|----|----------|----------|----------|
| 8  | 1.327282 | 0.934754 | -2.29156 |
| 8  | -1.30916 | 0.338032 | -2.97985 |
| 6  | -3.20166 | 3.01439  | 0.960182 |
| 6  | -3.94645 | 4.221765 | 0.251388 |
| 6  | 0.482526 | 1.847073 | -2.2794  |
| 6  | -1.02562 | 1.465017 | -2.52167 |
| 8  | -1.94691 | 3.025676 | 0.968372 |
| 8  | -3.21036 | 5.039421 | -0.36384 |
| 8  | -3.93119 | 2.053972 | 1.363928 |
| 8  | -5.20282 | 4.211158 | 0.303296 |
| 8  | 0.67889  | 3.075853 | -2.00002 |
| 8  | -1.88644 | 2.311123 | -2.09747 |
| 20 | -6.22607 | 2.15997  | 0.795028 |
| 20 | -1.09984 | 4.179942 | -0.88532 |
| 8  | -7.13413 | 0.052731 | 1.583975 |
| 8  | -9.24119 | -1.53814 | 2.00262  |
| 6  | -8.26737 | 0.635329 | 1.857956 |
| 6  | -9.49082 | -0.28557 | 2.226464 |
| 8  | -8.38577 | 1.878289 | 1.774714 |
| 8  | -10.5103 | 0.233953 | 2.639933 |
| 8  | -5.86008 | 0.939962 | -1.24101 |
| 1  | -6.28481 | 0.069754 | -1.41182 |
| 1  | -4.90278 | 0.725309 | -1.30142 |
| 8  | -3.12891 | 0.386597 | -0.67918 |
| 1  | -3.22658 | 0.698048 | 0.250199 |
| 1  | -2.79838 | 1.180455 | -1.18176 |
| 8  | -9.09951 | -3.81124 | 0.821018 |
| 1  | -9.6267  | -4.28884 | 0.166238 |
| 8  | 1.07087  | 5.087874 | -0.3874  |
| 1  | 1.631007 | 5.332553 | 0.362584 |
| 1  | 1.531855 | 4.380392 | -0.89369 |
| 1  | -9.6883  | -3.15777 | 1.274322 |
| 8  | -0.83065 | -3.62363 | -1.05268 |
| 1  | -1.41267 | -3.91996 | -0.32513 |
| 8  | 0.330695 | -1.42199 | -1.76298 |
| 1  | 0.786595 | -0.56072 | -2.05229 |
| 6  | 1.123622 | -2.29257 | -1.07217 |
| 6  | 0.491623 | -3.47699 | -0.65333 |
| 6  | 1.191593 | -4.42636 | 0.077444 |
| 6  | 2.456241 | -2.06396 | -0.76358 |
| 6  | 2.529397 | -4.18957 | 0.397691 |
| 1  | 3.079126 | -4.92801 | 0.973787 |
| 1  | 2.914494 | -1.1354  | -1.08901 |

|   |          |          |          |
|---|----------|----------|----------|
| 6 | 3.181904 | -3.01658 | -0.01897 |
| 1 | 0.696672 | -5.342   | 0.388832 |
| 6 | 4.585678 | -2.82963 | 0.346065 |
| 1 | 5.032938 | -3.62528 | 0.94015  |
| 6 | 5.38519  | -1.79271 | 0.037016 |
| 1 | 5.057686 | -0.9415  | -0.55111 |
| 6 | 6.786408 | -1.77423 | 0.505545 |
| 8 | 7.325799 | -2.6449  | 1.165038 |
| 8 | 7.403653 | -0.63881 | 0.098869 |
| 6 | 8.774364 | -0.44509 | 0.510704 |
| 6 | 9.732251 | -1.29599 | -0.33456 |
| 6 | 9.043206 | 1.054619 | 0.368766 |
| 1 | 8.873238 | -0.76288 | 1.550637 |
| 6 | 11.19408 | -0.95526 | 0.019094 |
| 1 | 9.547805 | -2.35227 | -0.11014 |
| 6 | 10.4958  | 1.406992 | 0.698584 |
| 1 | 8.851631 | 1.36289  | -0.66342 |
| 1 | 8.372363 | 1.612138 | 1.026706 |
| 6 | 11.45752 | 0.545702 | -0.14009 |
| 1 | 11.84733 | -1.50973 | -0.67535 |
| 1 | 12.49931 | 0.777639 | 0.116626 |
| 1 | 11.30514 | 0.821017 | -1.18872 |
| 8 | 9.49135  | -1.00761 | -1.71096 |
| 1 | 9.84019  | -1.74418 | -2.23453 |
| 8 | 11.40818 | -1.40034 | 1.358849 |
| 1 | 12.28921 | -1.10415 | 1.637078 |
| 8 | 10.66212 | 2.796374 | 0.383399 |
| 1 | 11.58764 | 3.025966 | 0.571511 |
| 6 | 10.74897 | 1.292463 | 2.21361  |
| 8 | 9.916438 | 1.167262 | 3.078239 |
| 8 | 12.07343 | 1.47048  | 2.504749 |
| 1 | 12.12939 | 1.489912 | 3.479178 |

**Table S7.** A comparison of structural parameters in COM unit before and after binding with apigenin.

| Structural parameters | COM unit bond lengths in Å | COM-Apigenin complex bond lengths in Å |
|-----------------------|----------------------------|----------------------------------------|
| Ca1-O2                | 2.31                       | 2.37                                   |
| Ca1-O3                | 2.28                       | 2.35                                   |
| Ca1-O4                | 2.34                       | 2.41                                   |
| Ca1-O8                | 2.35                       | 2.47                                   |
| H2-O9                 | 1.92                       | 1.84                                   |
| Ca1-Ca2               | 5.77                       | 5.85                                   |
| Ca2-Ca3               | 5.73                       | 5.83                                   |
| Ca3-Ca4               | 5.66                       | 4.44                                   |
| Ca4-Ca1               | 5.62                       | 5.95                                   |

**Complete citation of ref 25a.**

Gaussian 16, Revision A.03, M. J. Frisch, G. W. Trucks, H. B. Schlegel, G. E. Scuseria, M. A. Robb, J. R. Cheeseman, G. Scalmani, V. Barone, G. A. Petersson, H. Nakatsuji, X. Li, M. Caricato, A. V. Marenich, J. Bloino, B. G. Janesko, R. Gomperts, B. Mennucci, H. P. Hratchian, J. V. Ortiz, A. F. Izmaylov, J. L. Sonnenberg, D. Williams-Young, F. Ding, F. Lipparini, F. Egidi, J. Goings, B. Peng, A. Petrone, T. Henderson, D. Ranasinghe, V. G. Zakrzewski, J. Gao, N. Rega, G. Zheng, W. Liang, M. Hada, M. Ehara, K. Toyota, R. Fukuda, J. Hasegawa, M. Ishida, T. Nakajima, Y. Honda, O. Kitao, H. Nakai, T. Vreven, K. Throssell, J. A. Montgomery, Jr., J. E. Peralta, F. Ogliaro, M. J. Bearpark, J. J. Heyd, E. N. Brothers, K. N. Kudin, V. N. Staroverov, T. A. Keith, R. Kobayashi, J. Normand, K. Raghavachari, A. P. Rendell, J. C. Burant, S. S. Iyengar, J. Tomasi, M. Cossi, J. M. Millam, M. Klene, C. Adamo, R. Cammi, J. W. Ochterski, R. L. Martin, K. Morokuma, O. Farkas, J. B. Foresman, and D. J. Fox, Gaussian, Inc., Wallingford CT, 2016.
